# Supplementary material for: Growth of narrow-bandgap Cl-doped carbon nitride nanofibers on carbon nitride nanosheets for high-efficiency photocatalytic H2O2 generation
Source: Royal Society of Chemistry journal article supplement (doi:10.1039/d1ra05787a), 2021-01-01
Supplement: d1ra05787a1.pdf [file d1ra05787a1.pdf]

## Supporting Information

### **Growth of narrow-bandgap Cl-doped carbon nitride nanofibers on carbon nitride nanosheets for high-efficiency photocatalytic H<sub>2</sub>O<sub>2</sub> generation**

Tingshuo Ji<sup>a</sup>, Yanzhen Guo,<sup>\*b</sup> Huili Liu<sup>b</sup>, Binbin Chang<sup>b</sup>, Xuefeng Wei<sup>\*a</sup> and Baocheng Yang<sup>\*b</sup>

<sup>a</sup>College of Chemical Engineering & Pharmaceutics, Henan University of Science and Technology, Luoyang, 471023, PR China

<sup>b</sup>Henan Provincial Key Laboratory of Nanocomposites and Applications, Institute of Nanostructured Functional Materials, Huanghe Science and Technology College, Zhengzhou 450006, China

E-mail: [baochengyang@infm.hhstu.edu.cn](mailto:baochengyang@infm.hhstu.edu.cn)

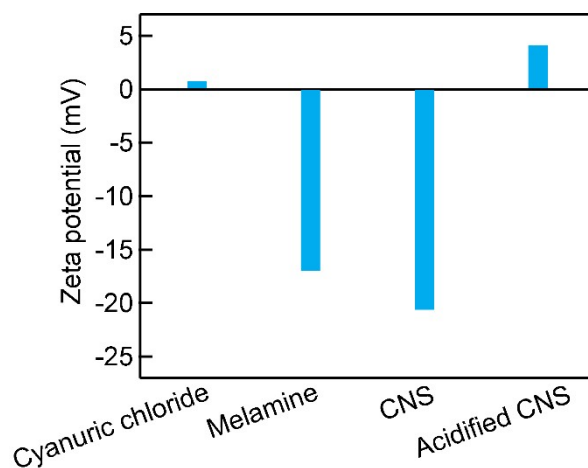

Fig. S1. Zeta potentials of the cyanuric chloride, melamine, CNS and acidified CNS samples.

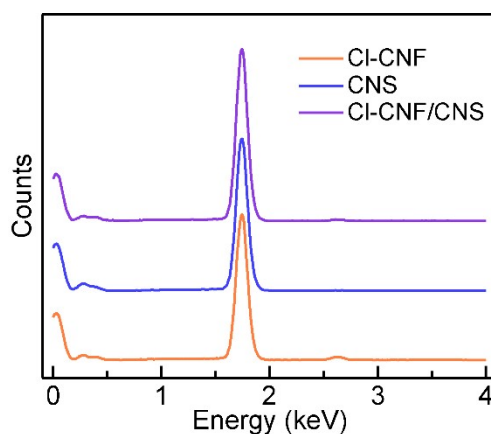

Fig. S2. EDX spectra of Cl-CNF, CNS and Cl-CNF/CNS.

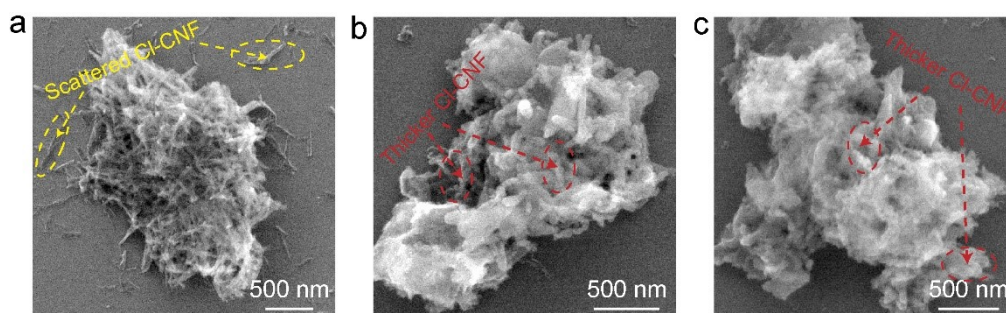

Fig. S3. (a) SEM image of Cl-CNF/CNS0.3 (Representative scattered Cl-CNF are marked in yellow dashed circles in the image). (b) SEM image of Cl-CNF/CNS0.5 (The thicker Cl-CNF are representatively marked in red dashed circles in the image). (c) SEM image of Cl-CNF/CNS0.6 (The thicker Cl-CNF are representatively marked in red dashed circles in the image).

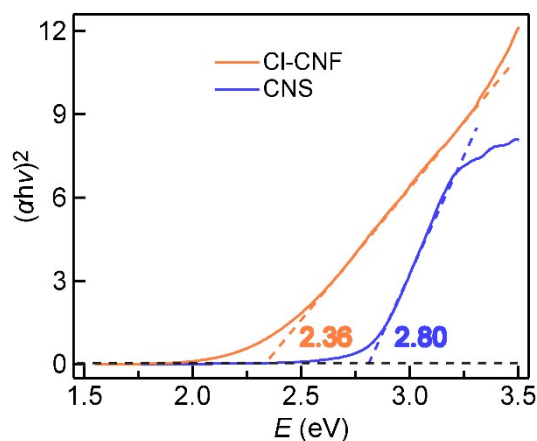

Fig. S4. Tauc plots of Cl-CNF and CNS.

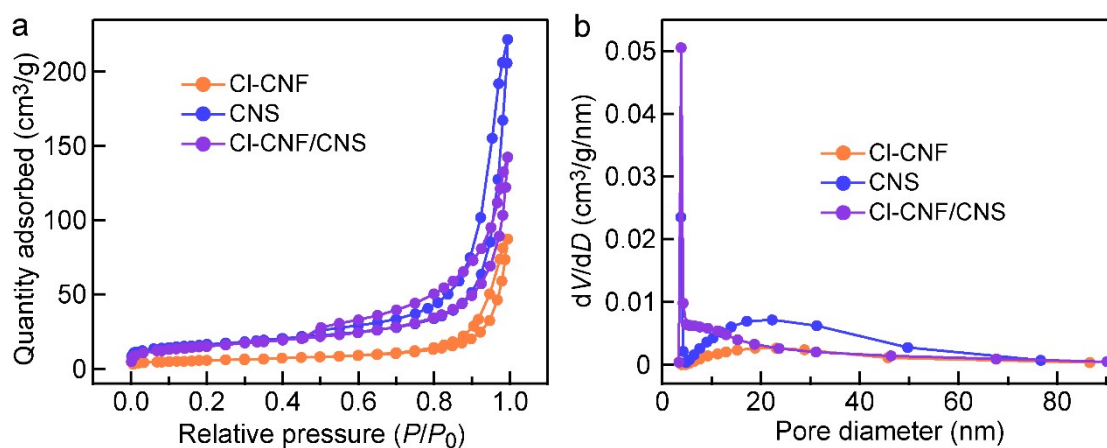

Fig. S5. Surface area and pore structure characterization of the samples. (a)  $N_2$  adsorption-desorption isotherms. (b) Pore size distribution.

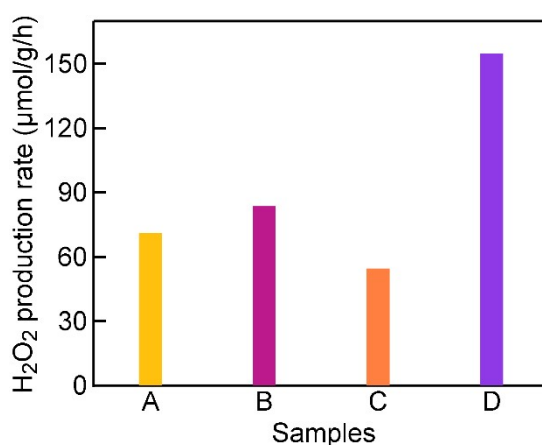

Fig. S6.  $H_2O_2$  evolution rates over various samples. The sample respectively are: (A) Melamine-derived carbon nitride. (B) Cl-CNF/melamine-derived carbon nitride nanohybrid. (C) Dicyandiamide-derived carbon nitride without  $NH_4Cl$ . (D) Cl-CNF/ dicyandiamide-derived carbon nitride without  $NH_4Cl$ .

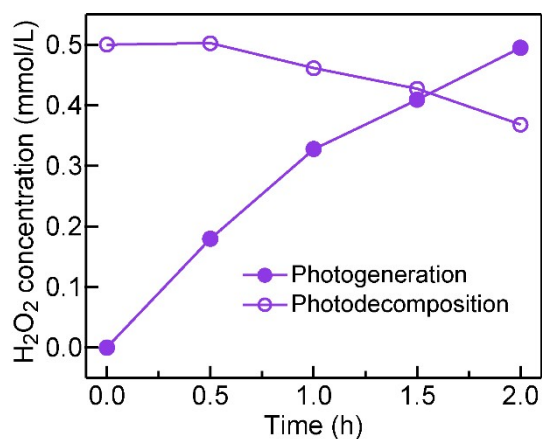

Fig. S7. Photodecomposition and production of H<sub>2</sub>O<sub>2</sub> over Cl-CNF/CNS.

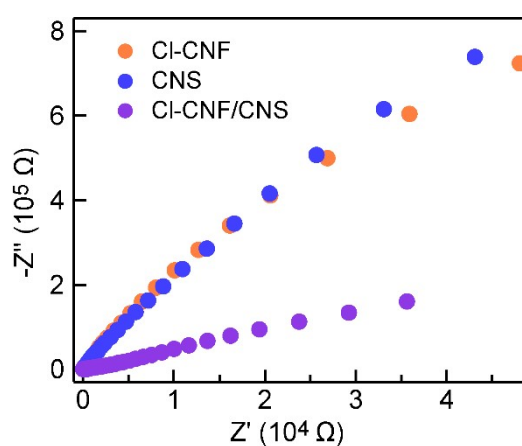

Fig. S8. EIS plots of the samples in dark.

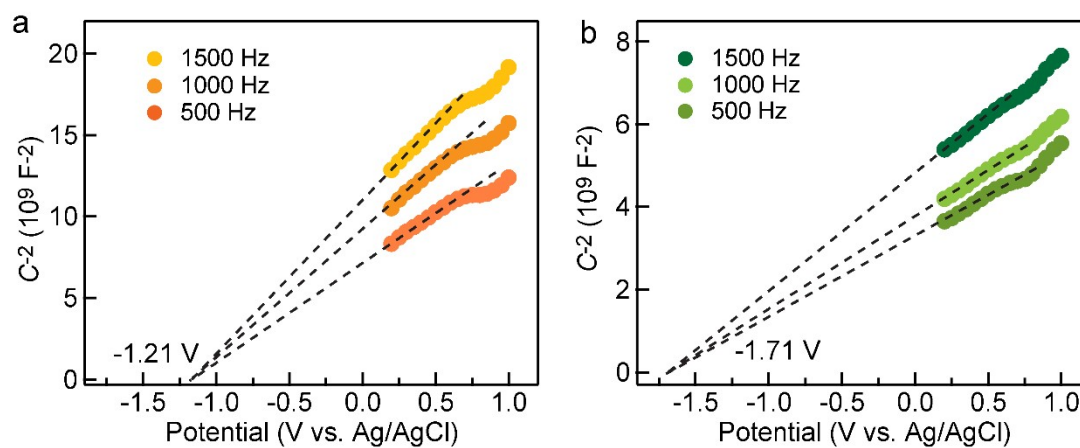

Fig. S9. Mott-Schottky curves of the samples. (a) Cl-CNF, (b) CNS.

Table S1. Atomic ratio of CI-CNF, CNS and CI-CNF/CNS.

| Sample     | C (%) | N (%) | Cl (%) |
|------------|-------|-------|--------|
| CI-CNF     | 39.08 | 58.25 | 2.67   |
| CNS        | 52.97 | 47.00 | 0.03   |
| CI-CNF/CNS | 30.7  | 68.1  | 1.12   |

Table S2. Comparison of photocatalytic H<sub>2</sub>O<sub>2</sub> production activity over different samples.

| Catalysts                                          | Reaction conditions                                          | H <sub>2</sub> O <sub>2</sub> rate (μmol/g/h) | AQY (%)         | Ref.      |
|----------------------------------------------------|--------------------------------------------------------------|-----------------------------------------------|-----------------|-----------|
| DCN-15A                                            | 50 mg catalyst, 60 mL 20 vol% IPA, $\lambda > 420$ nm        | 96.8                                          | 10.7 at 420nm   | S1        |
| CTF-BDDBN                                          | 30 mg catalyst, 50 ml H <sub>2</sub> O, $\lambda > 420$ nm   | 97.2                                          |                 | S2        |
| PT-g-C <sub>3</sub> N <sub>4</sub>                 | 30 mg catalyst, 60 ml H <sub>2</sub> O, $\lambda > 400$ nm   | 28.92                                         |                 | S3        |
| g-C <sub>3</sub> N <sub>4</sub> -450               | 100 mg catalyst, 100 ml H <sub>2</sub> O, $\lambda > 420$ nm | 170                                           | 4.3 at 420 nm   | S4        |
| GCN (56)                                           | 20 mg catalyst, 5 mL 90 vol% ethanol, $\lambda > 420$ nm     | 188                                           |                 | S5        |
| 50-Co/CN                                           | 20 mg catalyst, 20 mL 10 vol% ethanol, $\lambda > 420$ nm    | 70                                            |                 | S6        |
| g-C <sub>3</sub> N <sub>4</sub> -SiW <sub>11</sub> | 100 mg catalyst, 100 mL 5 vol% methanol, AM 1.5, pH=3        | 178                                           | 6.5 at 420nm    | S7        |
| CI-CNF/CNS                                         | 50 mg catalyst, 50 mL 10 vol% ethanol, $\lambda > 420$ nm    | 247.5                                         | 23.67 at 420 nm | This work |

## References

- S1 L. Shi, L. Yang, W. Zhou, Y. Liu, L. Yin, X. Hai, H. Song and J. Ye, *Small*, 2018, **14**, 1703142.
- S2 L. Chen, L. Wang, Y. Wan, Y. Zhang, Z. Qi, X. Wu and H. Xu, *Adv. Mater.*, 2019, **32**, 1904433.

- S3 N. Lu, N. Liu, Y. Hui, K. Shang, N. Jiang, J. Li and Y. Wu. *Chemosphere*, 2020, **241**, 124927.
- S4 Z. Zhu, H. Pan, M. Muruganathan, J. Gong and Y. Zhang, *Appl. Catal., B*, 2018, **232**, 19–25.
- S5 Y. Shiraishi, Y. Kofuji, H. Sakamoto, S. Tanaka, S. Ichikawa and T. Hirai, *ACS Catal.*, 2015, **5**, 3058–3066.
- S6 Y. Peng, L. Wang, Y. Liu, H. Chen, J. Lei and J. Zhang, *Eur. J. Inorg. Chem.*, 2017, **2017**, 4797–4802.
- S7 S. Zhao, X. Zhao, S. Ouyang and Y. Zhu. *Catal. Sci. Technol.*, 2018, **8**, 1686–1695.
